# Supplementary material
Source: MDPI journal article supplement (https://www.mdpi.com/2227-7080/5/4/71)
Supplement: s1 [file s1]

## Sheet: Sheet1
Appendix A: Links to Low and High Market Prices of Equivalent Products.
Item Description	Low Market Link	High Market Link
Ball Valve O-ring Small (1/2")	https://www.grainger.com/product/GRAINGER-APPROVED-O-Ring-5JJR2	https://shop.advanceautoparts.com/p/dorman-pik-a-nut-o-ring-rubber-i.d.-1-2-inch-o.d.-11-16-inch-thickness-3-32-inch-64112.1/3490831-P?searchTerm=1%2F2+in+o+ring
Ball Valve O-ring Medium (7/8")	https://www.grainger.com/product/GRAINGER-APPROVED-O-Ring-1BUP6	https://shop.advanceautoparts.com/p/dorman-autograde-o-ring-rubber-i.d.-11-16-in.-o.d.-7-8-in.-thickness-3-32-in.-64115/22973148-P?searchTerm=7%2F8+in+o+ring
Ball Valve O-ring Large (1-1/2")	https://www.grainger.com/product/GRAINGER-APPROVED-O-Ring-1WNF8	https://www.webstaurantstore.com/hobart-00-067500-00012-o-ring/HP6000675000.html?utm_source=Google&utm_medium=cpc&utm_campaign=GoogleShopping&gclid=EAIaIQobChMI9t6R57W81QIVAZJpCh0XkQ-qEAQYASABEgIU5fD_BwE
2 1/2" Gasket Oil Resistant	https://shop.advanceautoparts.com/p/walker-gasket-31360/5601177-P	http://sur-sealinc.com/7000t-style-grafoil-ring-gasket-2-5-inch-pipe-size-1-8-inch-thick-150psi-tolerance-part-number-crg7000t-2500-125-150/
15.5" Drive Belt (Open Loop)	https://reprapchampion.com/products/5-meter-6mm-width-gt2-timing-belt-for-reprap-delta-3d-printer-kossel-rostock?utm_medium=cpc&utm_source=googlepla&variant=14726292166&gclid=EAIaIQobChMI9tmr0_i91QIVBQ1pCh2VkgM6EAQYASABEgKwKfD_BwE	https://www.amazon.com/Meters-pitch-wide-Timing-printer/dp/B00F2IQNX8
8"Drive Belt (Closed Loop)	https://www.amazon.com/Meters-pitch-wide-Timing-printer/dp/B00F2IQNX8	https://www.grainger.com/product/2UWA3&AL!2966!3!166587486658!!!g!82166724477!?gclid=EAIaIQobChMI9eDegaHf1QIVkjRpCh2KngVrEAQYAiABEgKvKfD_BwE&cm_mmc=PPC:+Google+PLA?campaignid=719343013&s_kwcid=AL!2966!3!166587486658!!!!82166724477!&ef_id=WRiSPAAAAMr39Bqs:20170817215652:s
Medical Ventilator Bag	http://www.theemsstore.com/store/product.aspx/productId/337/selectedVariationId/388/Allied-Healthcare-Disposable-Oxygen-Bag-Valve-Mask?utm_source=google&utm_campaign=google&utm_content=388&utm_medium=cpc&gclid=EAIaIQobChMIl8Otq8W71QIV2I-zCh2ysgyNEAQYBSABEgKyOPD_BwE	http://www.aedsuperstore.com/laerdal-the-bag-ii-disposable-resuscitator-adult-mask-4.html?gclid=EAIaIQobChMIl8Otq8W71QIV2I-zCh2ysgyNEAQYASABEgKPvfD_BwE
Machine Vibration Dampening Feet	https://www.amazon.com/Ideaworks-JB6368-Anti-Vibration-Pads/dp/B008GUYZWK/ref=lp_16413781_1_1?s=industrial&ie=UTF8&qid=1501780503&sr=1-1	https://www.amazon.com/dp/B0084F0FD0/ref=asc_df_B0084F0FD05106133/?tag=hyprod-20&creative=395033&creativeASIN=B0084F0FD0&linkCode=df0&hvadid=193125021548&hvpos=1o5&hvnetw=g&hvrand=2804013035659785372&hvpone=&hvptwo=&hvqmt=&hvdev=c&hvdvcmdl=&hvlocint=&hvlocphy=9017742&hvtargid=pla-329327254954
Hammer Ergonomic Grip	http://www.homedepot.com/p/RE-GRIP-7-in-Multi-Tool-Handle-Grip-PN36-7/203614658?cm_mmc=Shopping%7cTHD%7cG%7c0%7cG-BASE-PLA-D25T-HandTools%7c&gclid=EAIaIQobChMIqJr9j8m71QIVAwOGCh0TQws8EAkYAyABEgInKfD_BwE&gclsrc=aw.ds&dclid=CKGs6pfJu9UCFUitTwodtWAMMw	https://www.amazon.com/Re-Grip-PN44-7-Replacement-Handle-1-5-Inch/dp/B0072B6QAS?th=1
Shoe Heel Insole	https://www.massagewarehouse.com/products/rubber-heel-lifts/723-0061/?sourcecode=MGKB&sourcecode=MGK06&gclid=EAIaIQobChMI8MT5zcO71QIVjCaGCh3jAAyOEAkYASABEgLX7_D_BwE&kwid=productads-adid^53810243196-device^c-plaid^78762293510-sku^723%200061@ADL4MW-adType^PLA	https://www.shoes.com/vionic-with-orthaheel-technology-relief-3-4-length-orthotic/581991/1204315?cm_mmc=googleproductads_pla-_-none-_-none-_-none
BMX Bicycle Grip	https://www.walmart.com/ip/Pink-Mushroom-Bicycle-Grips/41289735?wmlspartner=wlpa&selectedSellerId=1131&adid=22222222227031857483&wl0=&wl1=g&wl2=c&wl3=59969800232&wl4=pla-122983371152&wl5=9017742&wl6=&wl7=&wl8=&wl9=pla&wl10=112562428&wl11=online&wl12=41289735&wl13=&veh=sem	https://www.danscomp.com/products/367248/Animal_Jeff_Kocsis_Grips.html
Casio Watch Strap	https://www.walmart.com/ip/Casio-Style-Replacement-19mm-Black-Watch-Strap/114744568?wmlspartner=wlpa&selectedSellerId=4152&adid=22222222227074841223&wmlspartner=wmtlabs&wl0=&wl1=g&wl2=c&wl3=188344635319&wl4=pla-293891755356&wl5=9017742&wl6=&wl7=&wl8=&wl9=pla&wl10=113506064&wl11=online&wl12=114744568&wl13=&veh=sem	https://www.amazon.com/dp/B00354PKCQ/ref=asc_df_B00354PKCQ5106133/?tag=hyprod-20&creative=395033&creativeASIN=B00354PKCQ&linkCode=df0&hvadid=167150549507&hvpos=1o4&hvnetw=g&hvrand=17459084792263968178&hvpone=&hvptwo=&hvqmt=&hvdev=c&hvdvcmdl=&hvlocint=&hvlocphy=9017742&hvtargid=pla-314454848611
Custom Ink Stamp	https://www.rubberstamps.com/productdetail.aspx?productid=THEME-THKU-4	https://www.rubberstamps.com/productdetail.aspx?productid=HOLIDAY%20ADDRESS%20EMBOSSER%20310
Custom Ice Cube Tray	https://www.walmart.com/ip/Drinkmate-Silicone-Ice-Tray/55081461?wmlspartner=wlpa&selectedSellerId=0&adid=22222222227076901912&wmlspartner=wmtlabs&wl0=&wl1=g&wl2=c&wl3=189548181001&wl4=pla-294656718909&wl5=9017742&wl6=&wl7=&wl8=&wl9=pla&wl10=8175035&wl11=online&wl12=55081461&wl13=&veh=sem	https://www.amazon.com/Tovolo-King-Cube-Trays-Black/dp/B00H2R6UBW/ref=pd_sbs_79_1?_encoding=UTF8&pd_rd_i=B00H2R6UBW&pd_rd_r=388QY9MCRQ72X9Z7SWXC&pd_rd_w=aDHDY&pd_rd_wg=dGF3T&psc=1&refRID=388QY9MCRQ72X9Z7SWXC
iPhone 5 Case	https://www.cellularoutfitter.com/apple/iphone-5/phone-cases-covers/apple-iphone-5-silicone-case-black.html?DZID=PPC_Google_PLA_1135_2_10537&utm_source=google&utm_medium=cpc&utm_term=1135_2_10537&utm_campaign=PLA&gclid=EAIaIQobChMI0tb2v6Pf1QIVxVmGCh2aBwl3EAkYASABEgL92_D_BwE	https://www.accessorygeeks.com/apple-iphone-5-silicone-case-orange.html?utm_source=google&utm_medium=comparisonshopping&utm_term=LCS-IPHONE5OR&gclid=EAIaIQobChMI187jwcO71QIVV1uGCh3HcwjZEAkYBiABEgLhxvD_BwE
Go Pro Session Camera Case	https://www.amazon.com/Goliton-Silicone-Rubber-Protector-Session/dp/B01H1OWN6Q/ref=sr_1_2?ie=UTF8&qid=1503008036&sr=8-2&keywords=gopro+session+silicone+case	https://shop.gopro.com/accessories-2/floaty-for-hero-session-cameras/ARFLT-001.html
Custom "Living" Hinge	http://www.myknobs.com/hr-1-33528wh.html?gclid=EAIaIQobChMI2PCwiMu71QIVDKtpCh0QLwlMEAQYBCABEgI6QvD_BwE	http://www.houseofantiquehardware.com/brushed-nickel-hinges-butt-ball-finial-3-1-2?utm_source=froog&utm_medium=cse-nc&utm_campaign=gdf&partner=froog&gdffi=acd9967c52ff4737a3a3e0a43a275a41&gdfms=D62CE6294FAD4FCBB464D88CFD8C7C9D&gclid=EAIaIQobChMI2PCwiMu71QIVDKtpCh0QLwlMEAQYASABEgJLA_D_BwE
